# Supplementary material
Source: publisher site journal article supplement (https://www.dovepress.com/article/247584)
Supplement: Supplementary file 1 [file get_supplementary_file.php]

CTL · 601

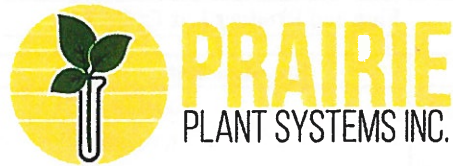

Finished Product Lot Release Certificate

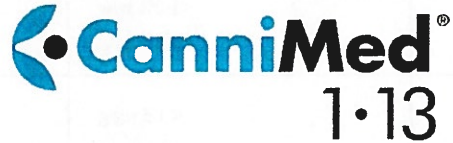

Finished Product Lot E160920A consisting of dried, milled flowering heads of *Cannabis sativa* spp.

Irradiated on **September 27, 2016**

Consisting of 93 x 30 g, 598 x 10 g & 597 x 5 g containers for a total of 1288 irradiated bottles weighed at 11.755 kg (net).

Batch controlled and verified to have been processed, packaged, and labelled in accordance with Standard Operating Procedures, being free of pesticide residue and foreign materials; and having been Quality Control checked to meet all specifications described by Prairie Plant Systems Inc.

MICHELLE TOWNSEND  
QC (Printed name)

*mtownsend*  
(Signature)

07-OCT-2016  
(Date)

RACHNA SAINI  
QA (Printed name)

*Rkarn*  
(Signature)

11-Oct-2016  
(Date)

100-0010

Finished Product Lot E160920A

| Test                                                                                                                                                                                                                                         |                                       | Specification          | Results                                                                                                                                                                                                                                                                                                                                                                                                                                                                                                                                                                                                                                                                                                                                                                                                                         | Pass/Fail |      |    |     |    |      |    |      |    |     |   |       |    |       |    |       |    |      |    |     |   |    |    |       |    |       |    |    |    |      |    |       |    |      |    |       |    |    |    |      |    |     |   |      |    |      |   |      |    |     |    |    |      |
|----------------------------------------------------------------------------------------------------------------------------------------------------------------------------------------------------------------------------------------------|---------------------------------------|------------------------|---------------------------------------------------------------------------------------------------------------------------------------------------------------------------------------------------------------------------------------------------------------------------------------------------------------------------------------------------------------------------------------------------------------------------------------------------------------------------------------------------------------------------------------------------------------------------------------------------------------------------------------------------------------------------------------------------------------------------------------------------------------------------------------------------------------------------------|-----------|------|----|-----|----|------|----|------|----|-----|---|-------|----|-------|----|-------|----|------|----|-----|---|----|----|-------|----|-------|----|----|----|------|----|-------|----|------|----|-------|----|----|----|------|----|-----|---|------|----|------|---|------|----|-----|----|----|------|
| Potency                                                                                                                                                                                                                                      | Delta-9-Tetrahydrocannabinol (Δ9-THC) | <0.5% w/w              | ND                                                                                                                                                                                                                                                                                                                                                                                                                                                                                                                                                                                                                                                                                                                                                                                                                              | Pass      |      |    |     |    |      |    |      |    |     |   |       |    |       |    |       |    |      |    |     |   |    |    |       |    |       |    |    |    |      |    |       |    |      |    |       |    |    |    |      |    |     |   |      |    |      |   |      |    |     |    |    |      |
|                                                                                                                                                                                                                                              | Tetrahydrocannabinolic Acid (THCA)    | <1.0% w/w              | 0.5 ± 0.0% w/w                                                                                                                                                                                                                                                                                                                                                                                                                                                                                                                                                                                                                                                                                                                                                                                                                  |           |      |    |     |    |      |    |      |    |     |   |       |    |       |    |       |    |      |    |     |   |    |    |       |    |       |    |    |    |      |    |       |    |      |    |       |    |    |    |      |    |     |   |      |    |      |   |      |    |     |    |    |      |
|                                                                                                                                                                                                                                              | Cannabidiol (CBD)                     | <0.5% w/w              | 0.3 ± 0.0% w/w                                                                                                                                                                                                                                                                                                                                                                                                                                                                                                                                                                                                                                                                                                                                                                                                                  |           |      |    |     |    |      |    |      |    |     |   |       |    |       |    |       |    |      |    |     |   |    |    |       |    |       |    |    |    |      |    |       |    |      |    |       |    |    |    |      |    |     |   |      |    |      |   |      |    |     |    |    |      |
|                                                                                                                                                                                                                                              | Cannabidiolic Acid (CBDA)             | 13.0 ± 2.6% w/w        | 13.1 ± 0.4% w/w                                                                                                                                                                                                                                                                                                                                                                                                                                                                                                                                                                                                                                                                                                                                                                                                                 |           |      |    |     |    |      |    |      |    |     |   |       |    |       |    |       |    |      |    |     |   |    |    |       |    |       |    |    |    |      |    |       |    |      |    |       |    |    |    |      |    |     |   |      |    |      |   |      |    |     |    |    |      |
|                                                                                                                                                                                                                                              | Cannabigerolic Acid (CBGA)            | <1.0% w/w              | 0.1 ± 0.0% w/w                                                                                                                                                                                                                                                                                                                                                                                                                                                                                                                                                                                                                                                                                                                                                                                                                  |           |      |    |     |    |      |    |      |    |     |   |       |    |       |    |       |    |      |    |     |   |    |    |       |    |       |    |    |    |      |    |       |    |      |    |       |    |    |    |      |    |     |   |      |    |      |   |      |    |     |    |    |      |
|                                                                                                                                                                                                                                              | Cannabinol (CBN)                      | <0.5% w/w              | ND                                                                                                                                                                                                                                                                                                                                                                                                                                                                                                                                                                                                                                                                                                                                                                                                                              |           |      |    |     |    |      |    |      |    |     |   |       |    |       |    |       |    |      |    |     |   |    |    |       |    |       |    |    |    |      |    |       |    |      |    |       |    |    |    |      |    |     |   |      |    |      |   |      |    |     |    |    |      |
| Metals Analysis                                                                                                                                                                                                                              | Arsenic                               | < 1.5 µg/g             | < 0.05 µg/g                                                                                                                                                                                                                                                                                                                                                                                                                                                                                                                                                                                                                                                                                                                                                                                                                     | Pass      |      |    |     |    |      |    |      |    |     |   |       |    |       |    |       |    |      |    |     |   |    |    |       |    |       |    |    |    |      |    |       |    |      |    |       |    |    |    |      |    |     |   |      |    |      |   |      |    |     |    |    |      |
|                                                                                                                                                                                                                                              | Cadmium                               | < 0.5 µg/g             | 0.05 µg/g                                                                                                                                                                                                                                                                                                                                                                                                                                                                                                                                                                                                                                                                                                                                                                                                                       |           |      |    |     |    |      |    |      |    |     |   |       |    |       |    |       |    |      |    |     |   |    |    |       |    |       |    |    |    |      |    |       |    |      |    |       |    |    |    |      |    |     |   |      |    |      |   |      |    |     |    |    |      |
| Metals Analysis                                                                                                                                                                                                                              | Lead                                  | < 1.0 µg/g             | 0.01 µg/g                                                                                                                                                                                                                                                                                                                                                                                                                                                                                                                                                                                                                                                                                                                                                                                                                       | Pass      |      |    |     |    |      |    |      |    |     |   |       |    |       |    |       |    |      |    |     |   |    |    |       |    |       |    |    |    |      |    |       |    |      |    |       |    |    |    |      |    |     |   |      |    |      |   |      |    |     |    |    |      |
|                                                                                                                                                                                                                                              | Mercury                               | < 1.5 µg/g             | < 0.005 µg/g                                                                                                                                                                                                                                                                                                                                                                                                                                                                                                                                                                                                                                                                                                                                                                                                                    |           |      |    |     |    |      |    |      |    |     |   |       |    |       |    |       |    |      |    |     |   |    |    |       |    |       |    |    |    |      |    |       |    |      |    |       |    |    |    |      |    |     |   |      |    |      |   |      |    |     |    |    |      |
| Aluminum, Antimony, Barium, Beryllium, Bismuth, Boron, Calcium, Chromium, Cobalt, Copper, Iron, Magnesium, Manganese, Molybdenum, Nickel, Phosphorus, Selenium, Silicon, Silver, Strontium, Thallium, Tin, Titanium, Uranium, Vanadium, Zinc |                                       | Levels reported (µg/g) | <table border="0"> <tr><td>[Al</td><td>&lt;0.5</td><td>Mo</td><td>0.5</td></tr> <tr><td>Sb</td><td>&lt;0.1</td><td>Ni</td><td>0.07</td></tr> <tr><td>Ba</td><td>3.8</td><td>P</td><td>10400</td></tr> <tr><td>Be</td><td>&lt;0.01</td><td>Se</td><td>&lt;0.05</td></tr> <tr><td>Bi</td><td>0.03</td><td>Si</td><td>770</td></tr> <tr><td>B</td><td>30</td><td>Ag</td><td>&lt;0.01</td></tr> <tr><td>Ca</td><td>15900</td><td>Sr</td><td>35</td></tr> <tr><td>Cr</td><td>&lt;0.5</td><td>Tl</td><td>&lt;0.05</td></tr> <tr><td>Co</td><td>0.04</td><td>Sn</td><td>&lt;0.05</td></tr> <tr><td>Cu</td><td>13</td><td>Ti</td><td>0.24</td></tr> <tr><td>Fe</td><td>110</td><td>U</td><td>0.01</td></tr> <tr><td>Mg</td><td>5300</td><td>V</td><td>&lt;0.1</td></tr> <tr><td>Mn</td><td>138</td><td>Zn</td><td>82</td></tr> </table> | [Al       | <0.5 | Mo | 0.5 | Sb | <0.1 | Ni | 0.07 | Ba | 3.8 | P | 10400 | Be | <0.01 | Se | <0.05 | Bi | 0.03 | Si | 770 | B | 30 | Ag | <0.01 | Ca | 15900 | Sr | 35 | Cr | <0.5 | Tl | <0.05 | Co | 0.04 | Sn | <0.05 | Cu | 13 | Ti | 0.24 | Fe | 110 | U | 0.01 | Mg | 5300 | V | <0.1 | Mn | 138 | Zn | 82 | Pass |
| [Al                                                                                                                                                                                                                                          | <0.5                                  | Mo                     | 0.5                                                                                                                                                                                                                                                                                                                                                                                                                                                                                                                                                                                                                                                                                                                                                                                                                             |           |      |    |     |    |      |    |      |    |     |   |       |    |       |    |       |    |      |    |     |   |    |    |       |    |       |    |    |    |      |    |       |    |      |    |       |    |    |    |      |    |     |   |      |    |      |   |      |    |     |    |    |      |
| Sb                                                                                                                                                                                                                                           | <0.1                                  | Ni                     | 0.07                                                                                                                                                                                                                                                                                                                                                                                                                                                                                                                                                                                                                                                                                                                                                                                                                            |           |      |    |     |    |      |    |      |    |     |   |       |    |       |    |       |    |      |    |     |   |    |    |       |    |       |    |    |    |      |    |       |    |      |    |       |    |    |    |      |    |     |   |      |    |      |   |      |    |     |    |    |      |
| Ba                                                                                                                                                                                                                                           | 3.8                                   | P                      | 10400                                                                                                                                                                                                                                                                                                                                                                                                                                                                                                                                                                                                                                                                                                                                                                                                                           |           |      |    |     |    |      |    |      |    |     |   |       |    |       |    |       |    |      |    |     |   |    |    |       |    |       |    |    |    |      |    |       |    |      |    |       |    |    |    |      |    |     |   |      |    |      |   |      |    |     |    |    |      |
| Be                                                                                                                                                                                                                                           | <0.01                                 | Se                     | <0.05                                                                                                                                                                                                                                                                                                                                                                                                                                                                                                                                                                                                                                                                                                                                                                                                                           |           |      |    |     |    |      |    |      |    |     |   |       |    |       |    |       |    |      |    |     |   |    |    |       |    |       |    |    |    |      |    |       |    |      |    |       |    |    |    |      |    |     |   |      |    |      |   |      |    |     |    |    |      |
| Bi                                                                                                                                                                                                                                           | 0.03                                  | Si                     | 770                                                                                                                                                                                                                                                                                                                                                                                                                                                                                                                                                                                                                                                                                                                                                                                                                             |           |      |    |     |    |      |    |      |    |     |   |       |    |       |    |       |    |      |    |     |   |    |    |       |    |       |    |    |    |      |    |       |    |      |    |       |    |    |    |      |    |     |   |      |    |      |   |      |    |     |    |    |      |
| B                                                                                                                                                                                                                                            | 30                                    | Ag                     | <0.01                                                                                                                                                                                                                                                                                                                                                                                                                                                                                                                                                                                                                                                                                                                                                                                                                           |           |      |    |     |    |      |    |      |    |     |   |       |    |       |    |       |    |      |    |     |   |    |    |       |    |       |    |    |    |      |    |       |    |      |    |       |    |    |    |      |    |     |   |      |    |      |   |      |    |     |    |    |      |
| Ca                                                                                                                                                                                                                                           | 15900                                 | Sr                     | 35                                                                                                                                                                                                                                                                                                                                                                                                                                                                                                                                                                                                                                                                                                                                                                                                                              |           |      |    |     |    |      |    |      |    |     |   |       |    |       |    |       |    |      |    |     |   |    |    |       |    |       |    |    |    |      |    |       |    |      |    |       |    |    |    |      |    |     |   |      |    |      |   |      |    |     |    |    |      |
| Cr                                                                                                                                                                                                                                           | <0.5                                  | Tl                     | <0.05                                                                                                                                                                                                                                                                                                                                                                                                                                                                                                                                                                                                                                                                                                                                                                                                                           |           |      |    |     |    |      |    |      |    |     |   |       |    |       |    |       |    |      |    |     |   |    |    |       |    |       |    |    |    |      |    |       |    |      |    |       |    |    |    |      |    |     |   |      |    |      |   |      |    |     |    |    |      |
| Co                                                                                                                                                                                                                                           | 0.04                                  | Sn                     | <0.05                                                                                                                                                                                                                                                                                                                                                                                                                                                                                                                                                                                                                                                                                                                                                                                                                           |           |      |    |     |    |      |    |      |    |     |   |       |    |       |    |       |    |      |    |     |   |    |    |       |    |       |    |    |    |      |    |       |    |      |    |       |    |    |    |      |    |     |   |      |    |      |   |      |    |     |    |    |      |
| Cu                                                                                                                                                                                                                                           | 13                                    | Ti                     | 0.24                                                                                                                                                                                                                                                                                                                                                                                                                                                                                                                                                                                                                                                                                                                                                                                                                            |           |      |    |     |    |      |    |      |    |     |   |       |    |       |    |       |    |      |    |     |   |    |    |       |    |       |    |    |    |      |    |       |    |      |    |       |    |    |    |      |    |     |   |      |    |      |   |      |    |     |    |    |      |
| Fe                                                                                                                                                                                                                                           | 110                                   | U                      | 0.01                                                                                                                                                                                                                                                                                                                                                                                                                                                                                                                                                                                                                                                                                                                                                                                                                            |           |      |    |     |    |      |    |      |    |     |   |       |    |       |    |       |    |      |    |     |   |    |    |       |    |       |    |    |    |      |    |       |    |      |    |       |    |    |    |      |    |     |   |      |    |      |   |      |    |     |    |    |      |
| Mg                                                                                                                                                                                                                                           | 5300                                  | V                      | <0.1                                                                                                                                                                                                                                                                                                                                                                                                                                                                                                                                                                                                                                                                                                                                                                                                                            |           |      |    |     |    |      |    |      |    |     |   |       |    |       |    |       |    |      |    |     |   |    |    |       |    |       |    |    |    |      |    |       |    |      |    |       |    |    |    |      |    |     |   |      |    |      |   |      |    |     |    |    |      |
| Mn                                                                                                                                                                                                                                           | 138                                   | Zn                     | 82                                                                                                                                                                                                                                                                                                                                                                                                                                                                                                                                                                                                                                                                                                                                                                                                                              |           |      |    |     |    |      |    |      |    |     |   |       |    |       |    |       |    |      |    |     |   |    |    |       |    |       |    |    |    |      |    |       |    |      |    |       |    |    |    |      |    |     |   |      |    |      |   |      |    |     |    |    |      |
| Water Activity                                                                                                                                                                                                                               |                                       | < 0.650                | 0.56 ± 0.00                                                                                                                                                                                                                                                                                                                                                                                                                                                                                                                                                                                                                                                                                                                                                                                                                     | Pass      |      |    |     |    |      |    |      |    |     |   |       |    |       |    |       |    |      |    |     |   |    |    |       |    |       |    |    |    |      |    |       |    |      |    |       |    |    |    |      |    |     |   |      |    |      |   |      |    |     |    |    |      |
| Microbiological Purity                                                                                                                                                                                                                       | Total Aerobic                         | < 100 CFU/g            | 0 CFU/g                                                                                                                                                                                                                                                                                                                                                                                                                                                                                                                                                                                                                                                                                                                                                                                                                         | Pass      |      |    |     |    |      |    |      |    |     |   |       |    |       |    |       |    |      |    |     |   |    |    |       |    |       |    |    |    |      |    |       |    |      |    |       |    |    |    |      |    |     |   |      |    |      |   |      |    |     |    |    |      |
|                                                                                                                                                                                                                                              | Total Anaerobic                       | < 100 CFU/g            | 0 CFU/g                                                                                                                                                                                                                                                                                                                                                                                                                                                                                                                                                                                                                                                                                                                                                                                                                         |           |      |    |     |    |      |    |      |    |     |   |       |    |       |    |       |    |      |    |     |   |    |    |       |    |       |    |    |    |      |    |       |    |      |    |       |    |    |    |      |    |     |   |      |    |      |   |      |    |     |    |    |      |
|                                                                                                                                                                                                                                              | Bile Tolerant Gram Negative Bacteria  | < 100 CFU/g            | 0 CFU/g                                                                                                                                                                                                                                                                                                                                                                                                                                                                                                                                                                                                                                                                                                                                                                                                                         |           |      |    |     |    |      |    |      |    |     |   |       |    |       |    |       |    |      |    |     |   |    |    |       |    |       |    |    |    |      |    |       |    |      |    |       |    |    |    |      |    |     |   |      |    |      |   |      |    |     |    |    |      |
|                                                                                                                                                                                                                                              | <i>Escherichia coli</i>               | Absent*                | Absent                                                                                                                                                                                                                                                                                                                                                                                                                                                                                                                                                                                                                                                                                                                                                                                                                          |           |      |    |     |    |      |    |      |    |     |   |       |    |       |    |       |    |      |    |     |   |    |    |       |    |       |    |    |    |      |    |       |    |      |    |       |    |    |    |      |    |     |   |      |    |      |   |      |    |     |    |    |      |
|                                                                                                                                                                                                                                              | <i>Salmonella</i> spp                 | Absent**               | Absent                                                                                                                                                                                                                                                                                                                                                                                                                                                                                                                                                                                                                                                                                                                                                                                                                          |           |      |    |     |    |      |    |      |    |     |   |       |    |       |    |       |    |      |    |     |   |    |    |       |    |       |    |    |    |      |    |       |    |      |    |       |    |    |    |      |    |     |   |      |    |      |   |      |    |     |    |    |      |
|                                                                                                                                                                                                                                              | <i>Staphylococcus aureus</i>          | < 100 CFU/g            | 0 CFU/g                                                                                                                                                                                                                                                                                                                                                                                                                                                                                                                                                                                                                                                                                                                                                                                                                         |           |      |    |     |    |      |    |      |    |     |   |       |    |       |    |       |    |      |    |     |   |    |    |       |    |       |    |    |    |      |    |       |    |      |    |       |    |    |    |      |    |     |   |      |    |      |   |      |    |     |    |    |      |
|                                                                                                                                                                                                                                              | Yeast and Mould                       | < 100 CFU/g            | 0 CFU/g                                                                                                                                                                                                                                                                                                                                                                                                                                                                                                                                                                                                                                                                                                                                                                                                                         |           |      |    |     |    |      |    |      |    |     |   |       |    |       |    |       |    |      |    |     |   |    |    |       |    |       |    |    |    |      |    |       |    |      |    |       |    |    |    |      |    |     |   |      |    |      |   |      |    |     |    |    |      |
| Toxic Mould                                                                                                                                                                                                                                  | Identify and report                   | 0 CFU/g                |                                                                                                                                                                                                                                                                                                                                                                                                                                                                                                                                                                                                                                                                                                                                                                                                                                 |           |      |    |     |    |      |    |      |    |     |   |       |    |       |    |       |    |      |    |     |   |    |    |       |    |       |    |    |    |      |    |       |    |      |    |       |    |    |    |      |    |     |   |      |    |      |   |      |    |     |    |    |      |
| Mycotoxins                                                                                                                                                                                                                                   | Aflatoxin B1                          | < 5 ng/g of substance  | BDL (< 1.5 ng/g)                                                                                                                                                                                                                                                                                                                                                                                                                                                                                                                                                                                                                                                                                                                                                                                                                | Pass      |      |    |     |    |      |    |      |    |     |   |       |    |       |    |       |    |      |    |     |   |    |    |       |    |       |    |    |    |      |    |       |    |      |    |       |    |    |    |      |    |     |   |      |    |      |   |      |    |     |    |    |      |
|                                                                                                                                                                                                                                              | Aflatoxin B2                          | < 20 ng/g of substance | BDL (< 1.5 ng/g)                                                                                                                                                                                                                                                                                                                                                                                                                                                                                                                                                                                                                                                                                                                                                                                                                |           |      |    |     |    |      |    |      |    |     |   |       |    |       |    |       |    |      |    |     |   |    |    |       |    |       |    |    |    |      |    |       |    |      |    |       |    |    |    |      |    |     |   |      |    |      |   |      |    |     |    |    |      |
|                                                                                                                                                                                                                                              | Aflatoxin G1                          | < 20 ng/g of substance | BDL (< 1.5 ng/g)                                                                                                                                                                                                                                                                                                                                                                                                                                                                                                                                                                                                                                                                                                                                                                                                                |           |      |    |     |    |      |    |      |    |     |   |       |    |       |    |       |    |      |    |     |   |    |    |       |    |       |    |    |    |      |    |       |    |      |    |       |    |    |    |      |    |     |   |      |    |      |   |      |    |     |    |    |      |
|                                                                                                                                                                                                                                              | Aflatoxin G2                          | < 20 ng/g of substance | BDL (< 1.5 ng/g)                                                                                                                                                                                                                                                                                                                                                                                                                                                                                                                                                                                                                                                                                                                                                                                                                |           |      |    |     |    |      |    |      |    |     |   |       |    |       |    |       |    |      |    |     |   |    |    |       |    |       |    |    |    |      |    |       |    |      |    |       |    |    |    |      |    |     |   |      |    |      |   |      |    |     |    |    |      |
|                                                                                                                                                                                                                                              | Ochratoxin A                          | < 20 ng/g of substance | BDL (< 10 ng/g)                                                                                                                                                                                                                                                                                                                                                                                                                                                                                                                                                                                                                                                                                                                                                                                                                 |           |      |    |     |    |      |    |      |    |     |   |       |    |       |    |       |    |      |    |     |   |    |    |       |    |       |    |    |    |      |    |       |    |      |    |       |    |    |    |      |    |     |   |      |    |      |   |      |    |     |    |    |      |

\* = not detected in 1 gram; \*\* = not detected in 25 grams; ND = not detected (no peaks identified); NA = Not Assayed

CTL-401

V.01

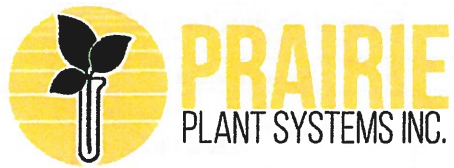

## Finished Product Lot Release Certificate

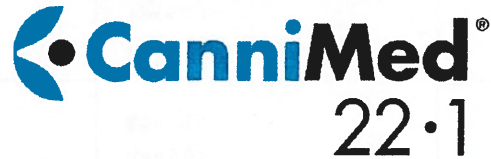

Finished Product Lot D160712A consisting of dried, milled flowering heads of *Cannabis sativa* spp.

Irradiated on **July 19, 2016**

Consisting of 530 x 30 g, 743 x 10 g & 208 x 5 g containers for a total of 1481 irradiated bottles weighed at 24.370 kg (net).

Batch controlled and verified to have been processed, packaged, and labelled in accordance with Standard Operating Procedures, being free of pesticide residue and foreign materials; and having been Quality Control checked to meet all specifications described by Prairie Plant Systems Inc.

MICHELLE TOWNSEND

QC (Printed name)

*Michelle Townsend*

(Signature)

12-SEPT-16

(Date)

RACHNA SAINI

QA (Printed name)

*Rachna Saini*

(Signature)

14 Sept 2016

(Date)

**Finished Product Lot D160712A**

| Test                   |                                                                                                                                                                                                                                              | Specification                | Results                                                                                                                                                                                                                                                                                                                                                                                                                                                                                                                                                                                                                                                                                                                                                                                                                                             | Pass/Fail    |      |    |     |    |      |    |       |    |     |   |      |    |       |    |       |    |       |    |      |   |    |    |       |    |       |    |    |    |      |    |       |    |       |    |       |    |     |    |       |    |     |   |       |    |      |   |      |    |     |    |    |             |
|------------------------|----------------------------------------------------------------------------------------------------------------------------------------------------------------------------------------------------------------------------------------------|------------------------------|-----------------------------------------------------------------------------------------------------------------------------------------------------------------------------------------------------------------------------------------------------------------------------------------------------------------------------------------------------------------------------------------------------------------------------------------------------------------------------------------------------------------------------------------------------------------------------------------------------------------------------------------------------------------------------------------------------------------------------------------------------------------------------------------------------------------------------------------------------|--------------|------|----|-----|----|------|----|-------|----|-----|---|------|----|-------|----|-------|----|-------|----|------|---|----|----|-------|----|-------|----|----|----|------|----|-------|----|-------|----|-------|----|-----|----|-------|----|-----|---|-------|----|------|---|------|----|-----|----|----|-------------|
| Potency                | Delta-9-Tetrahydrocannabinol ( $\Delta^9$ -THC)                                                                                                                                                                                              | <0.5% w/w                    | 0.3 $\pm$ 0.0% w/w                                                                                                                                                                                                                                                                                                                                                                                                                                                                                                                                                                                                                                                                                                                                                                                                                                  | <b>Pass</b>  |      |    |     |    |      |    |       |    |     |   |      |    |       |    |       |    |       |    |      |   |    |    |       |    |       |    |    |    |      |    |       |    |       |    |       |    |     |    |       |    |     |   |       |    |      |   |      |    |     |    |    |             |
|                        | Tetrahydrocannabinolic Acid (THCA)                                                                                                                                                                                                           | 22.0 $\pm$ 4.4% w/w          | 20.2 $\pm$ 1.0% w/w                                                                                                                                                                                                                                                                                                                                                                                                                                                                                                                                                                                                                                                                                                                                                                                                                                 |              |      |    |     |    |      |    |       |    |     |   |      |    |       |    |       |    |       |    |      |   |    |    |       |    |       |    |    |    |      |    |       |    |       |    |       |    |     |    |       |    |     |   |       |    |      |   |      |    |     |    |    |             |
|                        | Cannabidiol (CBD)                                                                                                                                                                                                                            | <0.5% w/w                    | ND                                                                                                                                                                                                                                                                                                                                                                                                                                                                                                                                                                                                                                                                                                                                                                                                                                                  |              |      |    |     |    |      |    |       |    |     |   |      |    |       |    |       |    |       |    |      |   |    |    |       |    |       |    |    |    |      |    |       |    |       |    |       |    |     |    |       |    |     |   |       |    |      |   |      |    |     |    |    |             |
|                        | Cannabidiolic Acid (CBDA)                                                                                                                                                                                                                    | <0.7% w/w                    | 0.04 $\pm$ 0.0% w/w                                                                                                                                                                                                                                                                                                                                                                                                                                                                                                                                                                                                                                                                                                                                                                                                                                 |              |      |    |     |    |      |    |       |    |     |   |      |    |       |    |       |    |       |    |      |   |    |    |       |    |       |    |    |    |      |    |       |    |       |    |       |    |     |    |       |    |     |   |       |    |      |   |      |    |     |    |    |             |
|                        | Cannabigerolic Acid (CBGA)                                                                                                                                                                                                                   | <1.0% w/w                    | 0.5 $\pm$ 0.0% w/w                                                                                                                                                                                                                                                                                                                                                                                                                                                                                                                                                                                                                                                                                                                                                                                                                                  |              |      |    |     |    |      |    |       |    |     |   |      |    |       |    |       |    |       |    |      |   |    |    |       |    |       |    |    |    |      |    |       |    |       |    |       |    |     |    |       |    |     |   |       |    |      |   |      |    |     |    |    |             |
|                        | Cannabinol (CBN)                                                                                                                                                                                                                             | <0.5% w/w                    | ND                                                                                                                                                                                                                                                                                                                                                                                                                                                                                                                                                                                                                                                                                                                                                                                                                                                  |              |      |    |     |    |      |    |       |    |     |   |      |    |       |    |       |    |       |    |      |   |    |    |       |    |       |    |    |    |      |    |       |    |       |    |       |    |     |    |       |    |     |   |       |    |      |   |      |    |     |    |    |             |
| Metals Analysis        | Arsenic                                                                                                                                                                                                                                      | < 1.5 $\mu$ g/g              | < 0.05 $\mu$ g/g                                                                                                                                                                                                                                                                                                                                                                                                                                                                                                                                                                                                                                                                                                                                                                                                                                    | <b>Pass</b>  |      |    |     |    |      |    |       |    |     |   |      |    |       |    |       |    |       |    |      |   |    |    |       |    |       |    |    |    |      |    |       |    |       |    |       |    |     |    |       |    |     |   |       |    |      |   |      |    |     |    |    |             |
|                        | Cadmium                                                                                                                                                                                                                                      | < 0.5 $\mu$ g/g              | 0.06 $\mu$ g/g                                                                                                                                                                                                                                                                                                                                                                                                                                                                                                                                                                                                                                                                                                                                                                                                                                      |              |      |    |     |    |      |    |       |    |     |   |      |    |       |    |       |    |       |    |      |   |    |    |       |    |       |    |    |    |      |    |       |    |       |    |       |    |     |    |       |    |     |   |       |    |      |   |      |    |     |    |    |             |
|                        | Lead                                                                                                                                                                                                                                         | < 1.0 $\mu$ g/g              | 0.01 $\mu$ g/g                                                                                                                                                                                                                                                                                                                                                                                                                                                                                                                                                                                                                                                                                                                                                                                                                                      |              |      |    |     |    |      |    |       |    |     |   |      |    |       |    |       |    |       |    |      |   |    |    |       |    |       |    |    |    |      |    |       |    |       |    |       |    |     |    |       |    |     |   |       |    |      |   |      |    |     |    |    |             |
|                        | Mercury                                                                                                                                                                                                                                      | < 1.5 $\mu$ g/g              | < 0.05 $\mu$ g/g                                                                                                                                                                                                                                                                                                                                                                                                                                                                                                                                                                                                                                                                                                                                                                                                                                    |              |      |    |     |    |      |    |       |    |     |   |      |    |       |    |       |    |       |    |      |   |    |    |       |    |       |    |    |    |      |    |       |    |       |    |       |    |     |    |       |    |     |   |       |    |      |   |      |    |     |    |    |             |
|                        | Aluminum, Antimony, Barium, Beryllium, Bismuth, Boron, Calcium, Chromium, Cobalt, Copper, Iron, Magnesium, Manganese, Molybdenum, Nickel, Phosphorus, Selenium, Silicon, Silver, Strontium, Thallium, Tin, Titanium, Uranium, Vanadium, Zinc | Levels reported ( $\mu$ g/g) | <table border="0"> <tr><td>Al</td><td>&lt;0.5</td><td>Mo</td><td>0.4</td></tr> <tr><td>Sb</td><td>&lt;0.1</td><td>Ni</td><td>&lt;0.05</td></tr> <tr><td>Ba</td><td>4.2</td><td>P</td><td>8300</td></tr> <tr><td>Be</td><td>&lt;0.01</td><td>Se</td><td>&lt;0.05</td></tr> <tr><td>Bi</td><td>&lt;0.01</td><td>Si</td><td>1600</td></tr> <tr><td>B</td><td>30</td><td>Ag</td><td>&lt;0.01</td></tr> <tr><td>Ca</td><td>16500</td><td>Sr</td><td>35</td></tr> <tr><td>Cr</td><td>&lt;0.5</td><td>Tl</td><td>&lt;0.05</td></tr> <tr><td>Co</td><td>&lt;0.01</td><td>Sn</td><td>&lt;0.05</td></tr> <tr><td>Cu</td><td>9.2</td><td>Ti</td><td>&lt;0.05</td></tr> <tr><td>Fe</td><td>120</td><td>U</td><td>&lt;0.01</td></tr> <tr><td>Mg</td><td>5900</td><td>V</td><td>&lt;0.1</td></tr> <tr><td>Mn</td><td>108</td><td>Zn</td><td>73</td></tr> </table> | Al           | <0.5 | Mo | 0.4 | Sb | <0.1 | Ni | <0.05 | Ba | 4.2 | P | 8300 | Be | <0.01 | Se | <0.05 | Bi | <0.01 | Si | 1600 | B | 30 | Ag | <0.01 | Ca | 16500 | Sr | 35 | Cr | <0.5 | Tl | <0.05 | Co | <0.01 | Sn | <0.05 | Cu | 9.2 | Ti | <0.05 | Fe | 120 | U | <0.01 | Mg | 5900 | V | <0.1 | Mn | 108 | Zn | 73 | <b>Pass</b> |
| Al                     | <0.5                                                                                                                                                                                                                                         | Mo                           | 0.4                                                                                                                                                                                                                                                                                                                                                                                                                                                                                                                                                                                                                                                                                                                                                                                                                                                 |              |      |    |     |    |      |    |       |    |     |   |      |    |       |    |       |    |       |    |      |   |    |    |       |    |       |    |    |    |      |    |       |    |       |    |       |    |     |    |       |    |     |   |       |    |      |   |      |    |     |    |    |             |
| Sb                     | <0.1                                                                                                                                                                                                                                         | Ni                           | <0.05                                                                                                                                                                                                                                                                                                                                                                                                                                                                                                                                                                                                                                                                                                                                                                                                                                               |              |      |    |     |    |      |    |       |    |     |   |      |    |       |    |       |    |       |    |      |   |    |    |       |    |       |    |    |    |      |    |       |    |       |    |       |    |     |    |       |    |     |   |       |    |      |   |      |    |     |    |    |             |
| Ba                     | 4.2                                                                                                                                                                                                                                          | P                            | 8300                                                                                                                                                                                                                                                                                                                                                                                                                                                                                                                                                                                                                                                                                                                                                                                                                                                |              |      |    |     |    |      |    |       |    |     |   |      |    |       |    |       |    |       |    |      |   |    |    |       |    |       |    |    |    |      |    |       |    |       |    |       |    |     |    |       |    |     |   |       |    |      |   |      |    |     |    |    |             |
| Be                     | <0.01                                                                                                                                                                                                                                        | Se                           | <0.05                                                                                                                                                                                                                                                                                                                                                                                                                                                                                                                                                                                                                                                                                                                                                                                                                                               |              |      |    |     |    |      |    |       |    |     |   |      |    |       |    |       |    |       |    |      |   |    |    |       |    |       |    |    |    |      |    |       |    |       |    |       |    |     |    |       |    |     |   |       |    |      |   |      |    |     |    |    |             |
| Bi                     | <0.01                                                                                                                                                                                                                                        | Si                           | 1600                                                                                                                                                                                                                                                                                                                                                                                                                                                                                                                                                                                                                                                                                                                                                                                                                                                |              |      |    |     |    |      |    |       |    |     |   |      |    |       |    |       |    |       |    |      |   |    |    |       |    |       |    |    |    |      |    |       |    |       |    |       |    |     |    |       |    |     |   |       |    |      |   |      |    |     |    |    |             |
| B                      | 30                                                                                                                                                                                                                                           | Ag                           | <0.01                                                                                                                                                                                                                                                                                                                                                                                                                                                                                                                                                                                                                                                                                                                                                                                                                                               |              |      |    |     |    |      |    |       |    |     |   |      |    |       |    |       |    |       |    |      |   |    |    |       |    |       |    |    |    |      |    |       |    |       |    |       |    |     |    |       |    |     |   |       |    |      |   |      |    |     |    |    |             |
| Ca                     | 16500                                                                                                                                                                                                                                        | Sr                           | 35                                                                                                                                                                                                                                                                                                                                                                                                                                                                                                                                                                                                                                                                                                                                                                                                                                                  |              |      |    |     |    |      |    |       |    |     |   |      |    |       |    |       |    |       |    |      |   |    |    |       |    |       |    |    |    |      |    |       |    |       |    |       |    |     |    |       |    |     |   |       |    |      |   |      |    |     |    |    |             |
| Cr                     | <0.5                                                                                                                                                                                                                                         | Tl                           | <0.05                                                                                                                                                                                                                                                                                                                                                                                                                                                                                                                                                                                                                                                                                                                                                                                                                                               |              |      |    |     |    |      |    |       |    |     |   |      |    |       |    |       |    |       |    |      |   |    |    |       |    |       |    |    |    |      |    |       |    |       |    |       |    |     |    |       |    |     |   |       |    |      |   |      |    |     |    |    |             |
| Co                     | <0.01                                                                                                                                                                                                                                        | Sn                           | <0.05                                                                                                                                                                                                                                                                                                                                                                                                                                                                                                                                                                                                                                                                                                                                                                                                                                               |              |      |    |     |    |      |    |       |    |     |   |      |    |       |    |       |    |       |    |      |   |    |    |       |    |       |    |    |    |      |    |       |    |       |    |       |    |     |    |       |    |     |   |       |    |      |   |      |    |     |    |    |             |
| Cu                     | 9.2                                                                                                                                                                                                                                          | Ti                           | <0.05                                                                                                                                                                                                                                                                                                                                                                                                                                                                                                                                                                                                                                                                                                                                                                                                                                               |              |      |    |     |    |      |    |       |    |     |   |      |    |       |    |       |    |       |    |      |   |    |    |       |    |       |    |    |    |      |    |       |    |       |    |       |    |     |    |       |    |     |   |       |    |      |   |      |    |     |    |    |             |
| Fe                     | 120                                                                                                                                                                                                                                          | U                            | <0.01                                                                                                                                                                                                                                                                                                                                                                                                                                                                                                                                                                                                                                                                                                                                                                                                                                               |              |      |    |     |    |      |    |       |    |     |   |      |    |       |    |       |    |       |    |      |   |    |    |       |    |       |    |    |    |      |    |       |    |       |    |       |    |     |    |       |    |     |   |       |    |      |   |      |    |     |    |    |             |
| Mg                     | 5900                                                                                                                                                                                                                                         | V                            | <0.1                                                                                                                                                                                                                                                                                                                                                                                                                                                                                                                                                                                                                                                                                                                                                                                                                                                |              |      |    |     |    |      |    |       |    |     |   |      |    |       |    |       |    |       |    |      |   |    |    |       |    |       |    |    |    |      |    |       |    |       |    |       |    |     |    |       |    |     |   |       |    |      |   |      |    |     |    |    |             |
| Mn                     | 108                                                                                                                                                                                                                                          | Zn                           | 73                                                                                                                                                                                                                                                                                                                                                                                                                                                                                                                                                                                                                                                                                                                                                                                                                                                  |              |      |    |     |    |      |    |       |    |     |   |      |    |       |    |       |    |       |    |      |   |    |    |       |    |       |    |    |    |      |    |       |    |       |    |       |    |     |    |       |    |     |   |       |    |      |   |      |    |     |    |    |             |
| Water Activity         |                                                                                                                                                                                                                                              | < 0.650                      | 0.66 $\pm$ 0.01                                                                                                                                                                                                                                                                                                                                                                                                                                                                                                                                                                                                                                                                                                                                                                                                                                     | <b>Pass†</b> |      |    |     |    |      |    |       |    |     |   |      |    |       |    |       |    |       |    |      |   |    |    |       |    |       |    |    |    |      |    |       |    |       |    |       |    |     |    |       |    |     |   |       |    |      |   |      |    |     |    |    |             |
| Microbiological Purity | Total Aerobic                                                                                                                                                                                                                                | < 100 CFU/g                  | 0 CFU/g                                                                                                                                                                                                                                                                                                                                                                                                                                                                                                                                                                                                                                                                                                                                                                                                                                             | <b>Pass</b>  |      |    |     |    |      |    |       |    |     |   |      |    |       |    |       |    |       |    |      |   |    |    |       |    |       |    |    |    |      |    |       |    |       |    |       |    |     |    |       |    |     |   |       |    |      |   |      |    |     |    |    |             |
|                        | Total Anaerobic                                                                                                                                                                                                                              | < 100 CFU/g                  | 0 CFU/g                                                                                                                                                                                                                                                                                                                                                                                                                                                                                                                                                                                                                                                                                                                                                                                                                                             |              |      |    |     |    |      |    |       |    |     |   |      |    |       |    |       |    |       |    |      |   |    |    |       |    |       |    |    |    |      |    |       |    |       |    |       |    |     |    |       |    |     |   |       |    |      |   |      |    |     |    |    |             |
|                        | Bile Tolerant Gram Negative Bacteria                                                                                                                                                                                                         | < 100 CFU/g                  | 0 CFU/g                                                                                                                                                                                                                                                                                                                                                                                                                                                                                                                                                                                                                                                                                                                                                                                                                                             |              |      |    |     |    |      |    |       |    |     |   |      |    |       |    |       |    |       |    |      |   |    |    |       |    |       |    |    |    |      |    |       |    |       |    |       |    |     |    |       |    |     |   |       |    |      |   |      |    |     |    |    |             |
|                        | <i>Escherichia coli</i>                                                                                                                                                                                                                      | Absent*                      | Absent                                                                                                                                                                                                                                                                                                                                                                                                                                                                                                                                                                                                                                                                                                                                                                                                                                              |              |      |    |     |    |      |    |       |    |     |   |      |    |       |    |       |    |       |    |      |   |    |    |       |    |       |    |    |    |      |    |       |    |       |    |       |    |     |    |       |    |     |   |       |    |      |   |      |    |     |    |    |             |
|                        | <i>Salmonella</i> spp                                                                                                                                                                                                                        | Absent**                     | Absent                                                                                                                                                                                                                                                                                                                                                                                                                                                                                                                                                                                                                                                                                                                                                                                                                                              |              |      |    |     |    |      |    |       |    |     |   |      |    |       |    |       |    |       |    |      |   |    |    |       |    |       |    |    |    |      |    |       |    |       |    |       |    |     |    |       |    |     |   |       |    |      |   |      |    |     |    |    |             |
|                        | <i>Staphylococcus aureus</i>                                                                                                                                                                                                                 | < 100 CFU/g                  | 0 CFU/g                                                                                                                                                                                                                                                                                                                                                                                                                                                                                                                                                                                                                                                                                                                                                                                                                                             |              |      |    |     |    |      |    |       |    |     |   |      |    |       |    |       |    |       |    |      |   |    |    |       |    |       |    |    |    |      |    |       |    |       |    |       |    |     |    |       |    |     |   |       |    |      |   |      |    |     |    |    |             |
|                        | Yeast and Mould                                                                                                                                                                                                                              | < 100 CFU/g                  | 0 CFU/g                                                                                                                                                                                                                                                                                                                                                                                                                                                                                                                                                                                                                                                                                                                                                                                                                                             |              |      |    |     |    |      |    |       |    |     |   |      |    |       |    |       |    |       |    |      |   |    |    |       |    |       |    |    |    |      |    |       |    |       |    |       |    |     |    |       |    |     |   |       |    |      |   |      |    |     |    |    |             |
|                        | Toxic Mould                                                                                                                                                                                                                                  | Identify and report          | 0 CFU/g                                                                                                                                                                                                                                                                                                                                                                                                                                                                                                                                                                                                                                                                                                                                                                                                                                             |              |      |    |     |    |      |    |       |    |     |   |      |    |       |    |       |    |       |    |      |   |    |    |       |    |       |    |    |    |      |    |       |    |       |    |       |    |     |    |       |    |     |   |       |    |      |   |      |    |     |    |    |             |
| Mycotoxins             | Aflatoxin B1                                                                                                                                                                                                                                 | < 5 ng/g of substance        | BDL (< 1.5 ng/g)                                                                                                                                                                                                                                                                                                                                                                                                                                                                                                                                                                                                                                                                                                                                                                                                                                    | <b>Pass</b>  |      |    |     |    |      |    |       |    |     |   |      |    |       |    |       |    |       |    |      |   |    |    |       |    |       |    |    |    |      |    |       |    |       |    |       |    |     |    |       |    |     |   |       |    |      |   |      |    |     |    |    |             |
|                        | Aflatoxin B2                                                                                                                                                                                                                                 | < 20 ng/g of substance       | BDL (< 1.5 ng/g)                                                                                                                                                                                                                                                                                                                                                                                                                                                                                                                                                                                                                                                                                                                                                                                                                                    |              |      |    |     |    |      |    |       |    |     |   |      |    |       |    |       |    |       |    |      |   |    |    |       |    |       |    |    |    |      |    |       |    |       |    |       |    |     |    |       |    |     |   |       |    |      |   |      |    |     |    |    |             |
|                        | Aflatoxin G1                                                                                                                                                                                                                                 | < 20 ng/g of substance       | BDL (< 1.5 ng/g)                                                                                                                                                                                                                                                                                                                                                                                                                                                                                                                                                                                                                                                                                                                                                                                                                                    |              |      |    |     |    |      |    |       |    |     |   |      |    |       |    |       |    |       |    |      |   |    |    |       |    |       |    |    |    |      |    |       |    |       |    |       |    |     |    |       |    |     |   |       |    |      |   |      |    |     |    |    |             |
|                        | Aflatoxin G2                                                                                                                                                                                                                                 | < 20 ng/g of substance       | BDL (< 1.5 ng/g)                                                                                                                                                                                                                                                                                                                                                                                                                                                                                                                                                                                                                                                                                                                                                                                                                                    |              |      |    |     |    |      |    |       |    |     |   |      |    |       |    |       |    |       |    |      |   |    |    |       |    |       |    |    |    |      |    |       |    |       |    |       |    |     |    |       |    |     |   |       |    |      |   |      |    |     |    |    |             |
|                        | Ochratoxin A                                                                                                                                                                                                                                 | < 20 ng/g of substance       | BDL (< 10 ng/g)                                                                                                                                                                                                                                                                                                                                                                                                                                                                                                                                                                                                                                                                                                                                                                                                                                     |              |      |    |     |    |      |    |       |    |     |   |      |    |       |    |       |    |       |    |      |   |    |    |       |    |       |    |    |    |      |    |       |    |       |    |       |    |     |    |       |    |     |   |       |    |      |   |      |    |     |    |    |             |

\* = not detected in 1 gram; \*\*= not detected in 25 grams; ND = not detected (no peaks identified); NA = Not Assayed  
 † See deviation report 16-09-12-MT-01

**Figure 1**

| Day                                                        | Post CCI Ipsilateral side<br>[Threshold response log (g × 10000)] |       |       |       |       |       |       |       |       |       |
|------------------------------------------------------------|-------------------------------------------------------------------|-------|-------|-------|-------|-------|-------|-------|-------|-------|
|                                                            | 1                                                                 | 2     | 3     | 4     | 5     | 6     | 7     | 8     | 9     | 10    |
| 0                                                          | 3.328                                                             | 3.328 | 3.049 | 3.049 | 3.328 | 3.328 | 3.328 | 3.328 | 3.328 | 3.049 |
| 3                                                          | 2.602                                                             | 2.602 | 1.903 | 1.903 | 1.903 | 1.903 | 1.903 | 1.903 | 1.903 | 1.903 |
| 7                                                          | 2.602                                                             | 2.602 | 1.903 | 2.602 | 2.301 | 1.903 | 1.903 | 1.903 | 1.903 | 1.903 |
| 14                                                         | 2.301                                                             | 2.301 | 2.602 | 1.903 | 2.301 | 2.602 | 1.903 | 1.903 | 1.903 | 2.602 |
| 21                                                         | 2.845                                                             | 1.903 | 2.301 | 2.301 | 2.301 | 2.301 | 1.903 | 2.602 | 1.903 | 1.903 |
| 28                                                         | 2.845                                                             | 2.602 | 1.903 | 3.049 | 2.845 | 2.301 | 1.903 | 2.301 | 1.903 | 1.903 |
| 35                                                         | 2.602                                                             | 3.049 | 2.845 | 3.049 | 2.602 | 2.602 | 2.602 | 2.602 | 1.903 | 2.845 |
| 42                                                         | 3.328                                                             | 3.328 | 2.845 | 3.328 | 3.049 | 3.328 | 3.328 | 2.845 | 2.845 | 2.845 |
| Contralateral side<br>[Threshold response log (g × 10000)] |                                                                   |       |       |       |       |       |       |       |       |       |
| Day                                                        | 1                                                                 | 2     | 3     | 4     | 5     | 6     | 7     | 8     | 9     | 10    |
| 0                                                          | 3.328                                                             | 3.328 | 3.049 | 3.049 | 3.328 | 2.845 | 3.328 | 3.328 | 3.328 | 3.049 |
| 3                                                          | 3.328                                                             | 3.328 | 3.049 | 3.049 | 3.328 | 2.845 | 3.328 | 3.328 | 3.328 | 3.049 |
| 7                                                          | 3.328                                                             | 3.328 | 3.049 | 3.049 | 3.328 | 2.845 | 3.328 | 3.328 | 3.328 | 3.049 |
| 14                                                         | 3.328                                                             | 3.328 | 3.328 | 3.328 | 3.328 | 3.328 | 2.845 | 3.049 | 3.328 | 3.328 |
| 21                                                         | 3.328                                                             | 3.049 | 3.049 | 3.328 | 3.049 | 2.845 | 3.328 | 2.845 | 3.328 | 3.328 |
| 28                                                         | 3.328                                                             | 3.328 | 3.328 | 3.328 | 3.049 | 2.845 | 2.845 | 2.845 | 3.328 | 2.845 |
| 35                                                         | 3.328                                                             | 3.049 | 2.845 | 3.328 | 3.049 | 2.845 | 2.845 | 3.328 | 3.049 | 2.845 |
| 42                                                         | 3.328                                                             | 3.328 | 3.328 | 3.328 | 3.049 | 3.328 | 3.328 | 2.845 | 2.845 | 3.328 |
| Non-operated Mice<br>[Threshold response log (g × 10000)]  |                                                                   |       |       |       |       |       |       |       |       |       |
| Day                                                        | 1                                                                 | 2     | 3     | 4     | 5     | 6     | 7     | 8     | 9     | 10    |
| 0                                                          | 3.328                                                             | 3.328 | 3.049 | 3.049 | 3.328 | 2.845 | 3.328 | 3.328 | 3.328 | 3.049 |
| 3                                                          | 2.845                                                             | 3.049 | 3.328 | 3.049 | 3.328 | 3.049 | 2.845 | 3.328 | 3.328 | 3.328 |
| 7                                                          | 3.328                                                             | 3.049 | 3.328 | 3.049 | 3.049 | 3.049 | 3.049 | 2.845 | 3.049 | 2.845 |
| 14                                                         | 3.328                                                             | 3.049 | 3.328 | 3.328 | 3.049 | 3.049 | 3.328 | 2.845 | 3.049 | 2.845 |
| 21                                                         | 3.049                                                             | 3.328 | 2.845 | 3.328 | 2.845 | 3.049 | 3.328 | 3.049 | 3.328 | 3.328 |
| 28                                                         | 3.049                                                             | 3.328 | 3.049 | 3.328 | 2.845 | 3.049 | 2.845 | 3.328 | 3.328 | 3.328 |
| 35                                                         | 3.049                                                             | 3.328 | 3.049 | 3.049 | 3.049 | 2.845 | 3.049 | 3.328 | 2.845 | 3.049 |
| 42                                                         | 2.845                                                             | 3.328 | 2.845 | 3.049 | 3.049 | 3.328 | 3.328 | 3.328 | 3.328 | 3.049 |

| <b>Figure 2A [Threshold response log (g × 10000)]</b>                  |       |       |       |       |       |       |       |       |
|------------------------------------------------------------------------|-------|-------|-------|-------|-------|-------|-------|-------|
| <b>Females</b>                                                         |       |       |       |       |       |       |       |       |
| <b>Dose (mg/kg) Baseline for Vehicle</b>                               |       |       |       |       |       |       |       |       |
| <b>0</b>                                                               | 2.301 | 2.301 | 1.903 | 2.301 | 2.301 | 2.301 | 2.602 | 1.903 |
| <b>Baseline for different doses CT-921 Extract</b>                     |       |       |       |       |       |       |       |       |
| <b>5.6</b>                                                             | 2.031 | 1.903 | 1.903 | 2.301 | 2.301 | 2.602 | 2.301 | 2.301 |
| <b>11.3</b>                                                            | 1.903 | 2.301 | 1.903 | 2.301 | 2.301 | 2.301 | 2.602 | 1.903 |
| <b>16.9</b>                                                            | 2.301 | 1.903 | 1.903 | 2.301 | 2.301 | 2.602 | 2.602 | 1.903 |
| <b>22.6</b>                                                            | 1.903 | 2.301 | 1.903 | 2.301 | 1.903 | 2.301 | 2.602 | 1.903 |
| <b>45.1</b>                                                            | 2.301 | 1.903 | 1.903 | 2.301 | 1.903 | 2.301 | 1.903 | 2.301 |
| <b>20 min after treatment with Vehicle (0 mg/kg) or CT-921 Extract</b> |       |       |       |       |       |       |       |       |
| <b>0</b>                                                               | 2.301 | 2.301 | 1.903 | 2.301 | 2.301 | 2.301 | 2.602 | 1.903 |
| <b>5.6</b>                                                             | 2.204 | 1.903 | 1.903 | 2.301 | 2.602 | 2.845 | 3.204 | 2.301 |
| <b>11.3</b>                                                            | 3.778 | 2.301 | 2.301 | 2.845 | 2.301 | 2.301 | 1.903 | 2.602 |
| <b>16.9</b>                                                            | 4     | 4.146 | 4.301 | 1.903 | 3.204 | 4.301 | 3.602 | 4.301 |
| <b>22.6</b>                                                            | 4.146 | 4.301 | 4.301 | 3.204 | 3.778 | 4.301 | 4.301 | 4.301 |
| <b>45.1</b>                                                            | 4.301 | 4.301 | 4.301 | 4.301 | 4.301 | 4.301 | 4.301 | 4.301 |

| <b>Figure 2B Vehicle</b>                    |       |       |       |       |       |       |       |       |
|---------------------------------------------|-------|-------|-------|-------|-------|-------|-------|-------|
| <b>[Threshold response log (g × 10000)]</b> |       |       |       |       |       |       |       |       |
| <b>Time (min)</b>                           |       |       |       |       |       |       |       |       |
| <b>0</b>                                    | 1.903 | 1.903 | 1.903 | 2.301 | 1.903 | 1.903 | 1.903 | 1.903 |
| <b>10</b>                                   | 1.903 | 1.903 | 1.903 | 2.301 | 1.903 | 1.903 | 1.903 | 1.903 |
| <b>20</b>                                   | 1.903 | 1.903 | 1.903 | 2.301 | 1.903 | 1.903 | 1.903 | 1.903 |
| <b>40</b>                                   | 1.903 | 1.903 | 1.903 | 2.301 | 1.903 | 1.903 | 1.903 | 1.903 |
| <b>80</b>                                   | 1.903 | 1.903 | 1.903 | 1.903 | 1.903 | 1.903 | 1.903 | 1.903 |
| <b>120</b>                                  | 1.903 | 1.903 | 1.903 | 1.903 | 1.903 | 1.903 | 1.903 | 1.903 |
| <b>180</b>                                  | 1.903 | 1.903 | 1.903 | 1.903 | 1.903 | 1.903 | 1.903 | 1.903 |
| <b>240</b>                                  | 1.903 | 1.903 | 1.903 | 1.903 | 1.903 | 1.903 | 1.903 | 1.903 |

| <b>Figure 2B CT-921 Extract at 16.9 mg/kg</b> |       |       |       |       |       |       |       |       |
|-----------------------------------------------|-------|-------|-------|-------|-------|-------|-------|-------|
| <b>[Threshold response log (g × 10000)]</b>   |       |       |       |       |       |       |       |       |
| <b>Time (min)</b>                             |       |       |       |       |       |       |       |       |
| <b>0</b>                                      | 1.903 | 1.903 | 1.903 | 1.903 | 1.903 | 1.903 | 1.903 | 2.301 |
| <b>10</b>                                     | 3.049 | 3.049 | 2.301 | 2.602 | 2.602 | 4.267 | 4.267 | 2.602 |
| <b>20</b>                                     | 2.301 | 3.049 | 3.328 | 2.602 | 2.602 | 4.267 | 4.267 | 4.267 |
| <b>40</b>                                     | 1.903 | 3.049 | 3.049 | 1.903 | 2.602 | 4.267 | 4.267 | 4.267 |
| <b>60</b>                                     | 1.903 | 2.845 | 2.602 | 1.903 | 2.301 | 4.199 | 3.99  | 4.267 |
| <b>120</b>                                    | 1.903 | 2.301 | 2.301 | 1.903 | 2.301 | 1.903 | 3.99  | 4.199 |
| <b>180</b>                                    | 1.903 | 1.903 | 2.301 | 1.903 | 1.903 | 1.903 | 2.845 | 1.903 |
| <b>240</b>                                    | 1.903 | 1.903 | 1.903 | 1.903 | 1.903 | 1.903 | 1.903 | 1.903 |

| Figure 2C [Threshold response log (g x 10000)]<br>Dose(mg/kg) Females: Baseline for Vehicle |       |       |       |       |       |       |       |       |
|---------------------------------------------------------------------------------------------|-------|-------|-------|-------|-------|-------|-------|-------|
| <b>0</b>                                                                                    | 1.903 | 2.301 | 2.301 | 1.903 | 1.903 | 2.301 | 1.903 | 1.903 |
| Baseline for different doses of CT-928 Extract                                              |       |       |       |       |       |       |       |       |
| <b>0.6</b>                                                                                  | 1.903 | 2.301 | 2.301 | 1.903 | 2.301 | 1.903 | 1.903 | 2.301 |
| <b>1.2</b>                                                                                  | 1.903 | 1.903 | 2.301 | 1.903 | 2.301 | 1.903 | 1.903 | 1.903 |
| <b>2.3</b>                                                                                  | 1.903 | 1.903 | 2.301 | 1.903 | 2.301 | 1.903 | 1.903 | 1.903 |
| <b>6.9</b>                                                                                  | 1.903 | 2.301 | 2.301 | 1.903 | 2.301 | 1.903 | 1.903 | 1.903 |
| 20 min after treatment with Vehicle (0 mg/kg) or CT-928 Extract                             |       |       |       |       |       |       |       |       |
| <b>0</b>                                                                                    | 1.903 | 2.301 | 2.301 | 1.903 | 1.903 | 1.903 | 1.903 | 2.301 |
| <b>0.6</b>                                                                                  | 1.903 | 2.301 | 2.602 | 3.99  | 2.301 | 3.328 | 2.301 | 2.845 |
| <b>1.2</b>                                                                                  | 2.845 | 3.328 | 2.301 | 4.199 | 1.903 | 3.328 | 3.328 | 3.75  |
| <b>2.3</b>                                                                                  | 4.267 | 3.75  | 4.267 | 3.328 | 3.328 | 3.328 | 3.75  | 3.75  |
| <b>6.9</b>                                                                                  | 3.049 | 3.99  | 4.267 | 3.328 | 3.99  | 4.267 | 4.199 | 3.328 |

| Figure 2D[Threshold response log (g × 10000)]<br>Time (min) Vehicle |       |       |       |       |       |       |       |       |
|---------------------------------------------------------------------|-------|-------|-------|-------|-------|-------|-------|-------|
| <b>0</b>                                                            | 1.903 | 2.301 | 2.301 | 1.903 | 1.903 | 1.903 | 1.903 | 2.301 |
| <b>10</b>                                                           | 1.903 | 2.301 | 2.301 | 1.903 | 1.903 | 2.301 | 1.903 | 1.903 |
| <b>20</b>                                                           | 1.903 | 2.301 | 2.301 | 1.903 | 2.301 | 1.903 | 1.903 | 2.301 |
| <b>40</b>                                                           | 1.903 | 2.301 | 2.301 | 1.903 | 2.301 | 1.903 | 1.903 | 2.301 |
| <b>60</b>                                                           | 1.903 | 2.301 | 2.301 | 1.903 | 2.301 | 1.903 | 1.903 | 2.301 |
| <b>120</b>                                                          | 1.903 | 2.301 | 2.301 | 1.903 | 2.301 | 1.903 | 1.903 | 2.301 |
| <b>240</b>                                                          | 1.903 | 2.301 | 2.301 | 1.903 | 2.301 | 1.903 | 1.903 | 2.301 |

| Figure 2D[Threshold response log (g × 10000)]<br>Time (min) CT-928 Extract at 2.3 mg/kg |       |       |       |       |       |       |       |       |
|-----------------------------------------------------------------------------------------|-------|-------|-------|-------|-------|-------|-------|-------|
| <b>0</b>                                                                                | 1.903 | 1.903 | 1.903 | 1.903 | 1.903 | 1.903 | 2.301 | 1.903 |
| <b>10</b>                                                                               | 4.267 | 3.75  | 4.267 | 3.328 | 3.328 | 3.328 | 3.75  | 3.75  |
| <b>20</b>                                                                               | 4.267 | 2.602 | 4.267 | 3.328 | 3.328 | 3.75  | 3.75  | 4.267 |
| <b>40</b>                                                                               | 4.267 | 2.301 | 3.75  | 3.049 | 3.328 | 3.328 | 3.328 | 3.99  |
| <b>60</b>                                                                               | 4.199 | 1.903 | 3.328 | 3.049 | 2.602 | 2.845 | 3.049 | 2.845 |
| <b>120</b>                                                                              | 4.199 | 1.903 | 3.328 | 2.602 | 2.602 | 2.602 | 1.903 | 2.602 |
| <b>240</b>                                                                              | 3.049 | 1.903 | 2.602 | 1.903 | 1.903 | 1.903 | 1.903 | 1.903 |

| <b>Dose (mg/kg) Figure 3A: CT-921 Extract Effects on Temperature (degrees C)</b>   |      |      |      |      |      |      |      |      |
|------------------------------------------------------------------------------------|------|------|------|------|------|------|------|------|
| 0.1                                                                                | 38.3 | 38.4 | 38.7 | 38.1 | 38.9 | 39.1 | 38.9 | 38.9 |
| 5.6                                                                                | 38.6 | 37.8 | 35.9 | 38.7 | 37.9 | 36.4 | 36.3 | 37.5 |
| 11.3                                                                               | 38.2 | 38.3 | 34   | 38.1 | 37.1 | 34.2 | 36.8 | 38.2 |
| 22.6                                                                               | 32.2 | 33.6 | 38   | 33.8 | 35.5 | 35   | 33   | 33.3 |
| 45.1                                                                               | 31.6 | 34.3 | 34   | 33.7 | 32.7 | 35   | 33.2 | 32.3 |
| <b>Dose (mg/kg) Figure 3B: CT-928 Extract Effects on Temperature (degrees C)</b>   |      |      |      |      |      |      |      |      |
| 0.1                                                                                | 38   | 38   | 39.3 | 38.2 | 38.7 | 39.1 | 39.2 | 38.8 |
| 0.25                                                                               | 38.7 | 38.9 | 38.1 | 38.5 | 38.4 | 39.3 | 38.7 | 39.1 |
| 0.5                                                                                | 38.6 | 38.1 | 37.2 | 38.6 | 38.9 | 36   | 37.9 | 36.4 |
| 1                                                                                  | 36.1 | 36.2 | 33.8 | 33.8 | 33.8 | 36.2 | 36.1 | 38   |
| 2                                                                                  | 35.8 | 37.3 | 35.5 | 33.4 | 33.8 | 33.4 | 33.6 | 34.7 |
| 6                                                                                  | 33.4 | 33.1 | 33.5 | 31.3 | 32.5 | 32.5 | 30.5 | 31.8 |
| <b>Dose (mg/kg) Figure 3C: CT-921 Extract Effects on Respiration (breaths/min)</b> |      |      |      |      |      |      |      |      |
| 0.1                                                                                | 228  | 192  | 182  | 220  | 180  | 255  | 230  | 177  |
| 5.6                                                                                | 196  | 252  | 195  | 244  | 183  | 180  | 115  | 193  |
| 11.3                                                                               | 193  | 128  | 216  | 120  | 112  | 204  | 180  | 207  |
| 22.6                                                                               | 140  | 146  | 217  | 139  | 194  | 168  | 156  | 90   |
| 45.1                                                                               | 65   | 117  | 117  | 97   | 134  | 98   | 83   | 82   |
| <b>Dose (mg/kg) Figure 3D: CT-928 Extract Effects on Respiration (breaths/min)</b> |      |      |      |      |      |      |      |      |
| 0.1                                                                                | 243  | 239  | 183  | 140  | 230  | 200  | 230  | 268  |
| 0.3                                                                                | 122  | 188  | 232  | 200  | 200  | 195  | 230  | 248  |
| 0.6                                                                                | 184  | 193  | 240  | 203  | 157  | 140  | 148  | 235  |
| 1.2                                                                                | 126  | 220  | 104  | 150  | 187  | 176  | 187  | 151  |
| 2.3                                                                                | 140  | 88   | 186  | 82   | 140  | 100  | 125  | 178  |
| 6.9                                                                                | 104  | 99   | 95   | 62   | 97   | 74   | 65   | 84   |

| <b>Males [Threshold response log (g × 10000)]</b>                      |       |       |       |       |       |       |       |       |
|------------------------------------------------------------------------|-------|-------|-------|-------|-------|-------|-------|-------|
| <b>Dose(mg/kg) Baseline for Vehicle</b>                                |       |       |       |       |       |       |       |       |
| 0                                                                      | 2.301 | 2.602 | 1.903 | 2.301 | 2.301 | 2.301 | 2.301 | 1.903 |
| <b>Baseline for different doses of CT-921 Extract</b>                  |       |       |       |       |       |       |       |       |
| 5.6                                                                    | 2.301 | 1.903 | 1.903 | 2.301 | 2.301 | 2.602 | 2.301 | 2.301 |
| 11.3                                                                   | 2.602 | 2.301 | 2.602 | 2.301 | 2.301 | 2.301 | 2.602 | 1.903 |
| 22.6                                                                   | 2.301 | 1.903 | 2.301 | 2.301 | 2.301 | 2.602 | 2.602 | 1.903 |
| 45.1                                                                   | 1.903 | 2.301 | 1.903 | 2.301 | 2.602 | 2.301 | 2.602 | 1.903 |
| <b>20 min after treatment with Vehicle (0 mg/kg) or CT-921 Extract</b> |       |       |       |       |       |       |       |       |
| 0                                                                      | 2.602 | 1.903 | 2.301 | 1.903 | 2.602 | 1.903 | 2.301 | 2.301 |
| 5.6                                                                    | 3.602 | 2.301 | 2.845 | 1.903 | 2.301 | 1.903 | 1.903 | 2.301 |
| 11.3                                                                   | 3.602 | 2.301 | 2.301 | 1.903 | 2.845 | 2.301 | 2.301 | 2.845 |
| 22.6                                                                   | 3.602 | 1.903 | 2.845 | 2.602 | 2.602 | 2.845 | 4.146 | 2.602 |
| 45.1                                                                   | 3.602 | 2.845 | 3.778 | 4.301 | 4.301 | 3.602 | 4.301 | 4.301 |
